# Supplementary material for: The Cut-and-Play Algorithm: Computing Nash Equilibria via Outer Approximations
Source: Atypon-hosted journal article supplement (doi:10.1287/opre.2023.0327), 2025-07-08
Supplement: opre.2023.0327.sm2.pdf [file opre.2023.0327.sm2.pdf]

### EC.1. Proof of Theorem 3.

*Proof of Theorem 3 Finite Termination.* We show that CnP terminates in a finite number of steps. The calls to solve the NCP in [Step 4](#), and to the ESO in [Step 10](#) terminate in a finite number of steps because we assume the players' feasible sets are computationally convexifiable (in particular, condition (i) in [Assumption 1](#)). The only loop that could potentially not terminate is the `repeat` starting in [Step 2](#).

First, we restrict to the case where the set  $\mathcal{X}^i$  is bounded or finite for any player  $i$ . Any PAG  $\tilde{G}$  necessarily admits a PNE if the approximations  $\tilde{\mathcal{X}}_t^i$  are compact. Therefore, the algorithm never triggers [Step 5](#). Thus, [Step 11](#) is the only step refining the sets  $\tilde{\mathcal{X}}_t^i$  for some player  $i$ . As  $\mathcal{X}^i$  is computationally convexifiable for every player  $i$ , the ESO can, in a finite number of steps, refine the approximations  $\tilde{\mathcal{X}}_t^i$  to  $\text{conv}(\mathcal{X}^i)$ . As a consequence, the algorithm converges (in the worst case) to  $\bar{G}$  (*i.e.*, the exact convex approximation), and the correctness of the resulting MNE follows from [Theorem 1](#).

Second, if  $\mathcal{X}^i$  is unbounded for some player  $i$ , then a PNE for a given PAG  $\tilde{G}$  may not exist, and the algorithm may enter [Step 5](#). However, because  $\mathcal{X}^i$  is computationally convexifiable for every player  $i$ , the branching step and the ESO can refine, in a finite number of steps, the approximations  $\tilde{\mathcal{X}}_t^i$  to  $\text{conv}(\mathcal{X}^i)$ . Therefore, even in the unbounded case, the algorithm correctly returns an MNE, similarly to the bounded case.

*Proof of statements (i) and (ii).* We show that  $\hat{\sigma}$  is an MNE for  $G$ . If the algorithm returns  $\hat{\sigma}$ , then there exists an approximate game  $\tilde{G}$  in [Step 3](#) with a PNE  $\tilde{x}$ . We associate the PNE  $\tilde{x}$  with the mixed strategy profile  $\hat{\sigma}$ . Let the iteration associated with  $\tilde{G}$  having the PNE  $\tilde{x}$  be denoted with  $t = \theta$ , and, for each player  $i$ , let  $\tilde{\mathcal{X}}_\theta^i$  be the associated feasible region  $i$ . Then, for any player  $i$  and  $\bar{x}^i \in \tilde{\mathcal{X}}_\theta^i$ , it follows that  $f^i(\hat{\sigma}^i; \hat{\sigma}^{-i}) = f^i(\tilde{x}^i; \tilde{x}^{-i}) \leq f^i(\bar{x}^i; \hat{\sigma}^{-i})$ , *i.e.*, no player  $i$  has the incentive to deviate from  $\hat{\sigma}^i$  to any other strategy  $\bar{x}^i \in \tilde{\mathcal{X}}_\theta^i$  in  $\tilde{G}$ . Because  $\text{conv}(\mathcal{X}^i) \subseteq \tilde{\mathcal{X}}_\theta^i$  for any  $i$ , then the previous inequality holds for any  $\bar{x}^i \in \text{conv}(\mathcal{X}^i)$ . Moreover, by construction,  $\tilde{x}^i \in \text{conv}(\mathcal{X}^i)$ ; otherwise, the ESO would have returned `no` for player  $i$ .

We need to show that if the algorithm returns  $\emptyset$ , then the original game  $G$  has no MNE. We prove this via its contrapositive, *i.e.*, we show that if  $G$  has an MNE, then there exists an iteration  $t$  where  $\tilde{G}$  has a PNE and [Algorithm 1](#) returns the associated MNE in [Step 12](#). Since the feasible set  $\mathcal{X}^i$  of each player  $i$  is computationally convexifiable, we can take the last step  $t_{\text{last}}$  of the finitely many steps taken to convexify all players' feasible sets. From the definition of computational convexifiability, PAG  $\tilde{G}$  at step  $t_{\text{last}}$  corresponds to the game where each player's feasible set is replaced by its convex hull, *i.e.*,  $\bar{G} = \tilde{G}$ . From [Theorem 1](#), we know that the convexified version of the game has a PNE if and only if the original game has an MNE. Thus, [Algorithm 1](#) has to find this PNE in its last iteration.  $\square$

## EC.2. Proof of [Theorem 4](#).

*Proof of [Theorem 4](#)* The ESO inner approximates the polyhedron  $\text{conv}(\mathcal{X})$  with its  $\mathcal{V}$ -representation, which is made of finitely many extreme rays and vertices. Hence, we have to prove that the ESO never finds, at any step, a vertex  $\nu$  (ray  $r$ ) in [Step 13](#) ([Step 10](#)) so that  $\nu$  is already in  $V$  ( $r$  is already in  $R$ ). This implies that the repeat loop in [Algorithm 2](#) terminates.

The inequality after the else statement in [Step 8](#) is valid for  $\mathcal{W}$  if and only if  $v^\top \bar{\pi} \leq \bar{\pi}_0$  for any  $v \in V$ , and  $r^\top \bar{\pi} \leq 0$  for any  $r \in R$  as of [\(6b\)](#) and [\(6c\)](#). Also, because the latter inequality is a separating hyperplane between  $\mathcal{W}$  and  $\bar{x}$ , then  $\bar{\pi}^\top \bar{x} > \bar{\pi}_0$ . However, it may not necessarily be a valid inequality for any element in  $\text{ext}(\text{conv}(\mathcal{X}))$  and  $\text{rec}(\text{conv}(\mathcal{X}))$ . Therefore, we must consider the optimization problem  $\mathcal{G}$  in [Step 9](#). On the one hand, if  $\mathcal{G}$  is bounded, let  $\nu$  be its optimal solution. Then, either (i.)  $\bar{\pi}^\top \nu < \bar{\pi}^\top \bar{x}$ , with  $\bar{\pi}^\top x \leq \bar{\pi}^\top \nu$  being a separating hyperplane between  $\text{conv}(\mathcal{X})$  and  $\bar{x}$ , and the algorithm terminates and returns **no**, or (ii.)  $\bar{\pi}^\top \nu \geq \bar{\pi}^\top \bar{x}$ ,  $\nu$  is necessarily a vertex of  $\text{ext}(\text{conv}(\mathcal{X})) \setminus V$  violating  $\bar{\pi}^\top x \leq \bar{\pi}_0$ , and the algorithm updates  $V \leftarrow V \cup \{\nu\}$ . On the other hand, if  $\mathcal{G}$  is unbounded, then there exists an extreme ray  $r$  so that  $r^\top \bar{\pi} > 0$ . Then,  $r$  is necessarily in  $\text{rec}(\text{conv}(\mathcal{X})) \setminus R$ ,  $\bar{\pi}^\top r > \bar{\pi}_0$ , and the algorithm updates  $R \leftarrow R \cup \{r\}$  and returns to [Step 6](#). As there are finitely many extreme rays and vertices, the algorithm terminates.  $\square$

### EC.3. IPGs Results

Tables EC.1 and EC.2 presents the full computational results for our experiments. The column names are analogous to those of Table 1, with the addition of a few columns. Specifically, we report the value of the social welfare in  $SW$  and the average numbers of: (i.) cuts from the ESO excluding value cuts ( $ESOCuts$ ), (ii.) value cuts from the ESO ( $VCuts$ ). Finally, in the time column, we report in parenthesis the time the algorithm spent to compute the first MNE; this is relevant when CnP optimizes the social welfare function via a MIP solver.

**Table EC.1** IPGs complete results, first set.

| Algorithm | O | C  | Time (s)     | #TL | SW      | #It   | Cuts | ESOCuts | VCuts | MIPCut |
|-----------|---|----|--------------|-----|---------|-------|------|---------|-------|--------|
| n=3 m=10  |   |    |              |     |         |       |      |         |       |        |
| SGM       | - | -  | 2.11         | 0   | 632.99  | 10.00 | -    | -       | -     | -      |
| CnP-MIP   | Q | -1 | 0.47 (0.23)  | 0   | 812.48  | 4.50  | 5.0  | 2.0     | 3.0   | 0.0    |
| CnP-MIP   | Q | 0  | 0.31 (0.14)  | 0   | 812.98  | 4.60  | 4.8  | 2.0     | 1.1   | 1.7    |
| CnP-MIP   | Q | 1  | 0.20 (0.08)  | 0   | 820.71  | 2.60  | 7.2  | 0.5     | 1.1   | 5.6    |
| CnP-PATH  | F | -1 | 0.02         | 0   | 706.66  | 5.00  | 5.9  | 2.0     | 3.9   | 0.0    |
| CnP-PATH  | F | 0  | 0.02         | 0   | 718.13  | 4.50  | 4.9  | 2.0     | 1.5   | 1.4    |
| CnP-PATH  | F | 1  | 0.03         | 0   | 742.87  | 2.00  | 5.4  | 0.3     | 0.7   | 4.4    |
| n=2 m=20  |   |    |              |     |         |       |      |         |       |        |
| SGM       | - | -  | 0.01         | 0   | 658.31  | 5.40  | -    | -       | -     | -      |
| CnP-MIP   | Q | -1 | 0.96 (0.25)  | 0   | 684.19  | 6.40  | 6.3  | 4.4     | 1.9   | 0.0    |
| CnP-MIP   | Q | 0  | 0.93 (0.29)  | 0   | 683.91  | 6.10  | 5.9  | 3.0     | 1.2   | 1.7    |
| CnP-MIP   | Q | 1  | 0.75 (0.18)  | 0   | 682.69  | 3.70  | 7.6  | 1.4     | 0.9   | 5.3    |
| CnP-PATH  | F | -1 | 0.05         | 0   | 645.44  | 5.30  | 5.5  | 3.1     | 2.4   | 0.0    |
| CnP-PATH  | F | 0  | 0.04         | 0   | 664.44  | 4.90  | 4.7  | 1.8     | 1.2   | 1.7    |
| CnP-PATH  | F | 1  | 0.03         | 0   | 656.44  | 3.10  | 6.2  | 1.2     | 0.4   | 4.6    |
| n=3 m=20  |   |    |              |     |         |       |      |         |       |        |
| SGM       | - | -  | 0.20         | 0   | 1339.98 | 9.90  | -    | -       | -     | -      |
| CnP-MIP   | Q | -1 | 29.74 (1.49) | 0   | 1488.96 | 12.50 | 17.4 | 7.0     | 10.4  | 0.0    |
| CnP-MIP   | Q | 0  | 27.22 (0.66) | 0   | 1473.46 | 6.50  | 8.7  | 4.0     | 1.2   | 3.5    |
| CnP-MIP   | Q | 1  | 29.61 (0.61) | 0   | 1476.85 | 4.20  | 14.0 | 2.0     | 0.5   | 11.5   |
| CnP-PATH  | F | -1 | 1.04         | 0   | 1327.47 | 12.50 | 19.2 | 6.3     | 12.9  | 0.0    |
| CnP-PATH  | F | 0  | 0.08         | 0   | 1325.23 | 6.40  | 8.1  | 3.4     | 1.6   | 3.1    |
| CnP-PATH  | F | 1  | 0.07         | 0   | 1361.74 | 4.60  | 15.0 | 2.2     | 0.5   | 12.3   |
| n=2 m=40  |   |    |              |     |         |       |      |         |       |        |
| SGM       | - | -  | 1.26         | 0   | 1348.56 | 13.70 | -    | -       | -     | -      |
| CnP-MIP   | Q | -1 | 27.87 (5.11) | 0   | 1433.13 | 16.70 | 21.9 | 11.1    | 10.8  | 0.0    |
| CnP-MIP   | Q | 0  | 25.58 (3.53) | 0   | 1434.09 | 12.80 | 13.4 | 8.2     | 1.1   | 4.1    |
| CnP-MIP   | Q | 1  | 29.72 (2.16) | 0   | 1405.30 | 10.50 | 18.7 | 6.4     | 0.7   | 11.6   |
| CnP-PATH  | F | -1 | 0.89         | 0   | 1355.26 | 16.80 | 20.7 | 9.5     | 11.2  | 0.0    |
| CnP-PATH  | F | 0  | 0.70         | 0   | 1355.01 | 10.00 | 9.9  | 7.1     | 0.8   | 2.0    |
| CnP-PATH  | F | 1  | 0.62         | 0   | 1355.21 | 7.80  | 14.1 | 5.1     | 0.3   | 8.7    |

**Table EC.2** IPGs complete results, second set.

| Algorithm | O | C  | Time (s)       | #TL | SW      | #It   | Cuts  | ESOCuts | VCuts | MIPCut |
|-----------|---|----|----------------|-----|---------|-------|-------|---------|-------|--------|
| n=3 m=40  |   |    |                |     |         |       |       |         |       |        |
| SGM       | - | -  | 27.04          | 2   | 2339.79 | 20.10 | -     | -       | -     | -      |
| CnP-MIP   | Q | -1 | 140.33 (5.49)  | 0   | 2991.76 | 20.20 | 28.5  | 13.2    | 15.3  | 0.0    |
| CnP-MIP   | Q | 0  | 128.74 (3.06)  | 0   | 3016.22 | 11.60 | 15.6  | 8.9     | 1.9   | 4.8    |
| CnP-MIP   | Q | 1  | 162.20 (2.58)  | 0   | 2980.69 | 9.30  | 21.9  | 6.7     | 0.9   | 14.3   |
| CnP-PATH  | F | -1 | 2.35           | 0   | 2882.45 | 17.60 | 24.9  | 12.6    | 12.3  | 0.0    |
| CnP-PATH  | F | 0  | 0.87           | 0   | 2906.33 | 10.80 | 14.0  | 8.8     | 1.4   | 3.8    |
| CnP-PATH  | F | 1  | 0.79           | 0   | 2898.04 | 9.00  | 21.1  | 6.6     | 0.8   | 13.7   |
| n=2 m=80  |   |    |                |     |         |       |       |         |       |        |
| SGM       | - | -  | 14.97          | 1   | 2676.52 | 19.40 | -     | -       | -     | -      |
| CnP-MIP   | Q | -1 | 29.83 (11.47)  | 0   | 3127.96 | 7.60  | 6.7   | 5.4     | 1.3   | 0.0    |
| CnP-MIP   | Q | 0  | 27.02 (7.27)   | 0   | 3127.97 | 7.80  | 7.0   | 5.3     | 0.7   | 1.0    |
| CnP-MIP   | Q | 1  | 36.71 (10.06)  | 0   | 3124.63 | 6.10  | 8.6   | 3.6     | 0.5   | 4.5    |
| CnP-PATH  | F | -1 | 7.71           | 0   | 2914.36 | 8.80  | 8.1   | 6.7     | 1.4   | 0.0    |
| CnP-PATH  | F | 0  | 5.45           | 0   | 2926.82 | 7.00  | 6.1   | 4.5     | 0.4   | 1.2    |
| CnP-PATH  | F | 1  | 4.93           | 0   | 2936.52 | 5.80  | 7.4   | 3.4     | 0.4   | 3.6    |
| n=2 m=100 |   |    |                |     |         |       |       |         |       |        |
| SGM       | - | -  | 77.13          | 3   | 2861.20 | 21.10 | -     | -       | -     | -      |
| CnP-MIP   | Q | -1 | 102.57 (36.29) | 0   | 3750.38 | 10.30 | 10.9  | 7.4     | 3.5   | 0.0    |
| CnP-MIP   | Q | 0  | 105.97 (33.07) | 1   | 3454.41 | 14.30 | 14.5  | 9.4     | 1.2   | 3.9    |
| CnP-MIP   | Q | 1  | 107.04 (30.86) | 0   | 3771.62 | 12.00 | 18.0  | 6.3     | 0.8   | 10.9   |
| CnP-PATH  | F | -1 | 23.02          | 0   | 3496.86 | 11.22 | 11.67 | 8.33    | 3.33  | 0.0    |
| CnP-PATH  | F | 0  | 14.46          | 0   | 3488.44 | 10.70 | 11.0  | 7.1     | 1.2   | 2.7    |
| CnP-PATH  | F | 1  | 14.56          | 0   | 3507.71 | 10.30 | 14.8  | 6.4     | 0.7   | 7.7    |
